# Supplementary material for: Attenuated total reflection Fourier-transform infrared spectral discrimination in human bodily fluids of oesophageal transformation to adenocarcinoma
Source: Royal Society of Chemistry journal article supplement (doi:10.1039/c9an01749f), 2019-01-01
Supplement: c9an01749f1.pdf [file c9an01749f1.pdf]

## Supplementary Information

### **Attenuated total reflection Fourier-transform infrared spectral discrimination in human bodily fluids of oesophageal transformation to adenocarcinoma**

Ishaan Maitra,<sup>a\*</sup> Camilo L. M. Morais,<sup>a</sup> Kássio M. G. Lima,<sup>a,b\*</sup> Katherine M. Ashton,<sup>c</sup>  
Ravindra S. Date<sup>c</sup> and Francis L. Martin<sup>a\*</sup>

*<sup>a</sup>School of Pharmacy and Biomedical Sciences, University of Central Lancashire, Preston  
PR1 2HE, UK*

*<sup>b</sup>Institute of Chemistry, Biological Chemistry and Chemometrics, Federal University of Rio  
Grande do Norte, Natal, Brazil*

*<sup>c</sup>Lancashire Teaching Hospitals NHS Foundation Trust, Royal Preston Hospital, Preston  
PR2 9HT, UK*

\*[ishaan.maitra@googlemail.com](mailto:ishaan.maitra@googlemail.com); [kassiolima@gmail.com](mailto:kassiolima@gmail.com); [flmartin@uclan.ac.uk](mailto:flmartin@uclan.ac.uk)

**Table S1:** Quality metrics (accuracy, sensitivity, specificity and F-scores) and multivariate classification methods (PCA-QDA and SPA-QDA) results for Normal vs. Inflammatory vs. Barrett's vs. LGD vs. HGD vs. OAC using **plasma** samples.

| <b>FOM</b>      | <b>PCA-QDA model for Oesophageal stages</b>   |                     |                  |            |            |            |
|-----------------|-----------------------------------------------|---------------------|------------------|------------|------------|------------|
|                 | <i>Normal</i>                                 | <i>Inflammatory</i> | <i>Barrett's</i> | <i>LGD</i> | <i>HGD</i> | <i>OAC</i> |
| Accuracy (%)    | 100                                           | 100                 | 100              | 92.3       | 92.3       | 100        |
| Sensitivity (%) | 100                                           | 100                 | 100              | 100        | 91.3       | 100        |
| Specificity (%) | 100                                           | 100                 | 100              | 0          | 100        | 100        |
| F-Scores (%)    | 100                                           | 100                 | 100              | 0          | 95.4       | 100        |
| <b>FOM</b>      | <b>SPA – QDA model for Oesophageal stages</b> |                     |                  |            |            |            |
|                 | <i>Normal</i>                                 | <i>Inflammatory</i> | <i>Barrett's</i> | <i>LGD</i> | <i>HGD</i> | <i>OAC</i> |
| Accuracy (%)    | 84.6                                          | 84.6                | 96.1             | 100        | 96.7       | 92.3       |
| Sensitivity (%) | 94.7                                          | 86.3                | 95.2             | 100        | 100        | 95.2       |
| Specificity (%) | 57.1                                          | 75.0                | 100              | 100        | 66.6       | 80         |
| F-Scores (%)    | 71.2                                          | 80.2                | 97.5             | 100        | 80         | 86.9       |

**Table S2:** Category-distinguishing wavenumbers for Normal vs. Inflammatory vs. Barrett's vs. LGD vs. HGD vs. OAC using **plasma** samples obtained for SPA-QDA and GA-QDA models.

| Wavenumbers (cm <sup>-1</sup> ) | Tentative Assignments                                                                            |
|---------------------------------|--------------------------------------------------------------------------------------------------|
| 929                             | Left-handed helix DNA (Z form)                                                                   |
| 952                             | Symmetric stretching vibration of $\nu_1\text{PO}_4^{3-}$ (phosphate of HA)                      |
| 987                             | OCH <sub>3</sub> (polysaccharides-cellulose)                                                     |
| 999                             | Ring stretching vibrations mixed strongly with CH in-plane bending                               |
| 1018                            | $\nu(\text{CO})$ , $\nu(\text{CC})$ , $\delta(\text{OCH})$ , ring (polysaccharides, pectin)      |
| 1053                            | $\nu\text{C-O}$ & $\delta\text{C-O}$ of carbohydrates                                            |
| 1072                            | Phosphate I band for two different C-O vibrations of Deoxyribose in DNA in disordering structure |
| 1134                            | Oligosaccharide C-OH stretching band 2-Methylmannoside                                           |
| 1180                            | Amide III band region                                                                            |
| 1354                            | Stretching C-O, deformation C-H, deformation N-H                                                 |
| 1381                            | $\delta\text{CH}_3$ Stretching C-O, deformation C-H, deformation N-H                             |
| 1388                            | Carbon particle                                                                                  |
| 1392                            | Less characteristic, due to aliphatic side groups of the amino acid residues                     |
| 1431                            | $\delta(\text{CH}_2)$ (polysaccharides, cellulose)                                               |
| 1485                            | Deformation C-H                                                                                  |
| 1539                            | Protein Amide II absorption- predominately $\beta$ -sheet of Amide II                            |
| 1585                            | Ring C-C stretch of phenyl                                                                       |
| 1624                            | Amide I region                                                                                   |
| 1643                            | Amide I band (arises from C=O stretching vibrations)                                             |
| 1681                            | C=O Guanine deformation N-H in plane                                                             |
| 1712                            | C=O                                                                                              |
| 1724                            | C=O stretching band mode of the fatty acid ester                                                 |

**Table S3:** Quality metrics (accuracy, sensitivity, specificity and F-scores) and multivariate classification methods (PCA-QDA, SPA-QDA and GA-QDA) results for Normal vs. Inflammatory vs. Barrett’s vs. LGD vs. HGD vs. OAC using **saliva** samples.

| <b>FOM – PCA-QDA</b> | <b>Oesophageal stages</b> |                     |                  |            |            |            |
|----------------------|---------------------------|---------------------|------------------|------------|------------|------------|
|                      | <i>Normal</i>             | <i>Inflammatory</i> | <i>Barrett’s</i> | <i>LGD</i> | <i>HGD</i> | <i>OAC</i> |
| Accuracy (%)         | 92.6                      | 100                 | 96.3             | 88.8       | 92.6       | 92.6       |
| Sensitivity (%)      | 89.4                      | 100                 | 100              | 96         | 91.6       | 100        |
| Specificity (%)      | 100                       | 100                 | 80               | 0          | 100        | 60         |
| F-Scores (%)         | 94.4                      | 100                 | 88.9             | 0          | 95.6       | 75         |
| <b>FOM – SPA-QDA</b> | <b>Oesophageal stages</b> |                     |                  |            |            |            |
|                      | <i>Normal</i>             | <i>Inflammatory</i> | <i>Barrett’s</i> | <i>LGD</i> | <i>HGD</i> | <i>OAC</i> |
| Accuracy (%)         | 88.8                      | 85.2                | 96.2             | 100        | 96.3       | 96.3       |
| Sensitivity (%)      | 100                       | 86.9                | 95.4             | 100        | 100        | 95.4       |
| Specificity (%)      | 62.5                      | 75                  | 100              | 100        | 66.6       | 100        |
| F-Scores (%)         | 76.9                      | 80.5                | 97.6             | 100        | 80         | 97.7       |
| <b>FOM – GA-QDA</b>  | <b>Oesophageal stages</b> |                     |                  |            |            |            |
|                      | <i>Normal</i>             | <i>Inflammatory</i> | <i>Barrett’s</i> | <i>LGD</i> | <i>HGD</i> | <i>OAC</i> |
| Accuracy (%)         | 92.5                      | 92.6                | 100              | 92.6       | 88.9       | 96.2       |
| Sensitivity (%)      | 100                       | 91.3                | 100              | 100        | 91.6       | 95.4       |
| Specificity (%)      | 75                        | 100                 | 100              | 0          | 66.6       | 100        |
| F-Scores (%)         | 85.7                      | 95.4                | 100              | 0          | 77.1       | 97.7       |

**Table S4:** Category-distinguishing wavenumbers for Normal vs. Inflammatory vs. Barrett's vs. LGD vs. HGD vs. OAC using **saliva** samples obtained for SPA-QDA and GA-QDA models.

| Wavenumbers (cm <sup>-1</sup> ) | Tentative Assignments                                                                       |
|---------------------------------|---------------------------------------------------------------------------------------------|
| 902                             | Phosphodiester region                                                                       |
| 991                             | C-O ribose, C-C                                                                             |
| 1003                            | Ring stretching vibrations mixed strongly with CH in-plane bending                          |
| 1014                            | $\nu(\text{CO})$ , $\nu(\text{CC})$ , $\delta(\text{OCH})$ , ring (polysaccharides, pectin) |
| 1068                            | Stretching C-O ribose                                                                       |
| 1099                            | Stretching $\text{PO}_2^-$ symmetric (phosphate II)                                         |
| 1107                            | $\nu(\text{CO})$ , $\nu(\text{CC})$ , $\delta(\text{OCH})$ , ring (polysaccharides, pectin) |
| 1431                            | $\delta(\text{CH}_2)$ (polysaccharides, cellulose)                                          |
| 1558                            | Ring base                                                                                   |
| 1585                            | Ring C-C stretch of phenyl                                                                  |
| 1589                            | Ring C-C stretch of phenyl                                                                  |
| 1604                            | Adenine vibration in DNA                                                                    |
| 1624                            | Peak of nucleic acids due to the base carbonyl stretching and ring breathing mode           |
| 1643                            | Amide I band (arises from C=O stretching vibrations)                                        |
| 1689                            | Peak of nucleic acids due to the base carbonyl stretching and ring breathing mode           |
| 1697                            | C <sub>2</sub> =O guanine                                                                   |
| 1701                            | C5=O guanine                                                                                |
| 1716                            | C=O thymine                                                                                 |
| 1743                            | C=O stretching mode of lipids                                                               |
| 1778                            | $\nu(\text{C}=\text{C})$ lipids, fatty acids                                                |
| 1786                            | $\nu(\text{C}=\text{C})$ lipids, fatty acids                                                |

**Table S5:** Quality metrics (accuracy, sensitivity, specificity and F-scores) and multivariate classification methods (PCA-QDA, SPA-QDA and GA-QDA) results for Normal vs. Inflammatory vs. Barrett’s vs. LGD vs. HGD vs. OAC using **serum** samples.

| <b>FOM – PCA-QDA</b> | <b>Oesophageal stages</b> |                     |                  |            |            |            |
|----------------------|---------------------------|---------------------|------------------|------------|------------|------------|
|                      | <i>Normal</i>             | <i>Inflammatory</i> | <i>Barrett’s</i> | <i>LGD</i> | <i>HGD</i> | <i>OAC</i> |
| Accuracy (%)         | 92.0                      | 92.0                | 96.0             | 92.0       | 92.0       | 96.0       |
| Sensitivity (%)      | 100                       | 90.4                | 100              | 95.6       | 95.4       | 95.2       |
| Specificity (%)      | 71.4                      | 100                 | 80               | 50.0       | 66.6       | 100        |
| F-Scores (%)         | 83.3                      | 95.0                | 88.8             | 65.6       | 78.5       | 97.5       |
| <b>FOM – SPA-QDA</b> | <b>Oesophageal stages</b> |                     |                  |            |            |            |
|                      | <i>Normal</i>             | <i>Inflammatory</i> | <i>Barrett’s</i> | <i>LGD</i> | <i>HGD</i> | <i>OAC</i> |
| Accuracy (%)         | 92.0                      | 88.0                | 92.0             | 92.0       | 92.0       | 96.0       |
| Sensitivity (%)      | 100                       | 90.4                | 95.0             | 95.6       | 95.4       | 95.2       |
| Specificity (%)      | 71.4                      | 75.0                | 80.0             | 50.0       | 66.6       | 100        |
| F-Scores (%)         | 93.3                      | 82.0                | 86.8             | 65.6       | 78.5       | 97.5       |
| <b>FOM – GA-QDA</b>  | <b>Oesophageal stages</b> |                     |                  |            |            |            |
|                      | <i>Normal</i>             | <i>Inflammatory</i> | <i>Barrett’s</i> | <i>LGD</i> | <i>HGD</i> | <i>OAC</i> |
| Accuracy (%)         | 96.0                      | 96.0                | 96.0             | 92.0       | 96.0       | 100        |
| Sensitivity (%)      | 100                       | 95.2                | 100              | 95.6       | 95.4       | 100        |
| Specificity (%)      | 85.7                      | 100                 | 80.0             | 50.0       | 100        | 100        |
| F-Scores (%)         | 92.3                      | 97.5                | 88.8             | 65.6       | 97.6       | 100        |

**Table S6:** Category-distinguishing wavenumbers for Normal vs. Inflammatory vs. Barrett's vs. LGD vs. HGD vs. OAC using **serum** samples obtained for SPA-QDA and GA-QDA models.

| Wavenumbers (cm <sup>-1</sup> ) | Tentative Assignments                                            |
|---------------------------------|------------------------------------------------------------------|
| 1041                            | Symmetric PO <sub>2</sub> <sup>-</sup> stretching in RNA and DNA |
| 1315                            | Amide III band components of proteins                            |
| 1319                            | Amide III band components of proteins Collagen                   |
| 1330                            | CH <sub>2</sub> wagging                                          |
| 1338                            | CH <sub>2</sub> wagging                                          |
| 1435                            | δ (CH <sub>2</sub> ) (polysaccharides, cellulose)                |
| 1442                            | δ(CH <sub>2</sub> ), lipids, fatty acids                         |
| 1446                            | δ(CH <sub>2</sub> ), lipids, fatty acids                         |
| 1477                            | CH <sub>2</sub> bending of the methylene chains in lipids        |
| 1492                            | C=C, deformation C-H                                             |
| 1539                            | Amide II                                                         |
| 1573                            | C=N adenine                                                      |
| 1593                            | Ring C-C stretch of phenyl                                       |
| 1600                            | Amide I band of proteins                                         |
| 1631                            | Ring C-C stretch of phenyl                                       |
| 1654                            | Amide I (of proteins in α-helix conformation)                    |
| 1662                            | Amide I band                                                     |
| 1743                            | C=O stretching mode of lipids                                    |

**Table S7:** Quality metrics (accuracy, sensitivity, specificity and F-scores) and multivariate classification methods (PCA-QDA, SPA-QDA and GA-QDA) results for Normal vs. Inflammatory vs. Barrett’s vs. LGD vs. HGD vs. OAC using urine samples.

| <b>FOM – PCA-QDA</b> | <b>Oesophageal stages</b> |                     |                  |            |            |            |
|----------------------|---------------------------|---------------------|------------------|------------|------------|------------|
|                      | <i>Normal</i>             | <i>Inflammatory</i> | <i>Barrett’s</i> | <i>LGD</i> | <i>HGD</i> | <i>OAC</i> |
| Accuracy (%)         | 100                       | 100                 | 100              | 100        | 100        | 100        |
| Sensitivity (%)      | 100                       | 100                 | 100              | 100        | 100        | 100        |
| Specificity (%)      | 100                       | 100                 | 100              | 100        | 100        | 100        |
| F-Scores (%)         | 100                       | 100                 | 100              | 100        | 100        | 100        |
| <b>FOM – SPA-QDA</b> | <b>Oesophageal stages</b> |                     |                  |            |            |            |
|                      | <i>Normal</i>             | <i>Inflammatory</i> | <i>Barrett’s</i> | <i>LGD</i> | <i>HGD</i> | <i>OAC</i> |
| Accuracy (%)         | 66.6                      | 77.7                | 92.6             | 96.2       | 92.6       | 77.7       |
| Sensitivity (%)      | 78.9                      | 78.2                | 95.4             | 96.0       | 100        | 90.9       |
| Specificity (%)      | 35.5                      | 75.0                | 80.0             | 100        | 33.3       | 20.0       |
| F-Scores (%)         | 50.8                      | 76.6                | 87.1             | 97.9       | 50.0       | 32.7       |
| <b>FOM – GA-QDA</b>  | <b>Oesophageal stages</b> |                     |                  |            |            |            |
|                      | <i>Normal</i>             | <i>Inflammatory</i> | <i>Barrett’s</i> | <i>LGD</i> | <i>HGD</i> | <i>OAC</i> |
| Accuracy (%)         | 74.1                      | 85.2                | 92.6             | 92.6       | 96.3       | 85.2       |
| Sensitivity (%)      | 78.9                      | 86.9                | 95.4             | 96.0       | 95.8       | 100        |
| Specificity (%)      | 62.5                      | 75.0                | 80.0             | 50.0       | 100        | 20.0       |
| F-Scores (%)         | 69.7                      | 80.5                | 87.0             | 65.7       | 97.8       | 33.3       |



**Table S8:** Category-distinguishing wavenumbers for Normal vs. Inflammatory vs. Barrett's vs. LGD vs. HGD vs. OAC using **urine** samples obtained for SPA-QDA and GA-QDA models.

| Wavenumbers (cm <sup>-1</sup> ) | Tentative Assignments                                                  |
|---------------------------------|------------------------------------------------------------------------|
| 906                             | Phosphodiester region                                                  |
| 956                             | C-O deoxyribose, C-C                                                   |
| 995                             | Ring breathing                                                         |
| 1018                            | Glycogen                                                               |
| 1030                            | Glycogen                                                               |
| 1095                            | $\nu_{as}PO_2^-$                                                       |
| 1118                            | $\nu(CO)$ , $\nu(CC)$ , $\delta(OCH)$ , ring (polysaccharides, pectin) |
| 1141                            | Symmetric $PO_2^-$ stretching in RNA and DNA                           |
| 1242                            | Amide III collagen                                                     |
| 1253                            | Amide III                                                              |
| 1334                            | $\delta(CH)$ , ring (polysaccharides, pectin)                          |
| 1381                            | $\delta CH_3$                                                          |
| 1431                            | Lipids                                                                 |
| 1446                            | $\delta(CH_2)$ , lipids, fatty acids                                   |
| 1500                            | In-plane CH bending vibration from the phenyl rings                    |
| 1550                            | Amide II of proteins                                                   |
| 1562                            | Amide II of proteins ( <i>e.g.</i> , side-chain carboxyl groups)       |
| 1577                            | Glutamate carboxylate stretching                                       |
| 1600                            | C=N cytosine, N-H adenine                                              |
| 1651                            | Amide I                                                                |
| 1681                            | C=O Guanine deformation N-H in plane                                   |
| 1712                            | C=O thymine                                                            |
| 1724                            | C=O stretching band mode of the fatty acid ester                       |
| 1735                            | C=O stretching (lipids)                                                |
| 1777                            | $\nu(C=C)$ lipids, fatty acids                                         |
